# Supplementary material for: Non-covalent interactions in the glutathione peroxidase active center and their influence on the enzyme activity
Source: Royal Society of Chemistry journal article supplement (doi:10.1039/d2ob00890d), 2022-01-01

Supporting Information for

**Non-covalent interactions in glutathione peroxidase active center and their influence on the enzyme activity**

Elena Yu. Tupikina\*

Institute of Chemistry, St. Petersburg University, Universitetskaya emb. 7/9, St. Petersburg, Russia

e-mail: [elenatupikina@gmail.com](mailto:elenatupikina@gmail.com)

**Table of Content**

|           |                                                                                                                                                                                                             |    |
|-----------|-------------------------------------------------------------------------------------------------------------------------------------------------------------------------------------------------------------|----|
|           | Coordinates of atoms of GPx-1 active center cut out from the enzyme X-Ray and used for initial guess for calculations                                                                                       | 2  |
|           | Optimized coordinates of atoms of GPx-1 active center in –SeH form                                                                                                                                          | 5  |
|           | Optimized coordinates of atoms of GPx-1 active center in –SeOH form                                                                                                                                         | 8  |
|           | Optimized coordinates of atoms of GPx-1 active center in –SeOOH form                                                                                                                                        | 11 |
| Figure S1 | Electron density (blue) and electrostatic potential (red) distribution along bond paths for non-covalent interactions in GPx-1 active center in –SeH form                                                   | 14 |
| Figure S2 | Electron density (blue) and electrostatic potential (red) distribution along bond paths for non-covalent interactions in GPx-1 active center in –SeOH form                                                  | 15 |
| Figure S3 | Electron density (blue) and electrostatic potential (red) distribution along bond paths for non-covalent interactions in GPx-1 active center in –SeOOH form. Positions of minima are shown by dashed lines. | 16 |

Coordinates of atoms of GPx-1 active center cut out from the enzyme X-Ray and used for initial guess for calculations

|    |             |             |             |
|----|-------------|-------------|-------------|
| C  | -2.98501100 | 2.80132700  | 1.08645500  |
| O  | -3.69889300 | 3.79415500  | 1.11237300  |
| Se | -0.05569500 | 0.53274300  | 0.38240900  |
| O  | -1.48771100 | -0.20025500 | -0.16278900 |
| C  | -4.79959100 | 0.03844800  | -0.61066400 |
| O  | -4.95850400 | -0.28473900 | -1.79068500 |
| C  | 4.10549000  | 2.73953400  | -0.56532500 |
| O  | 4.23958700  | 3.03330700  | -1.74996300 |
| C  | 2.28451800  | -2.35788800 | -1.71300500 |
| C  | 1.82184500  | -1.09769100 | -2.21046200 |
| C  | 0.60540200  | -2.30775700 | 2.29828900  |
| O  | 0.02889900  | -1.21099200 | 2.30754500  |
| C  | 2.73250700  | -0.07440700 | 2.26651500  |
| O  | 2.46103000  | 1.11325900  | 2.47864400  |
| O  | -2.02481700 | 2.61071900  | -1.92214600 |
| H  | -1.93170300 | 3.28064100  | -2.61382200 |
| H  | -2.21093300 | 1.74904500  | -2.38647500 |
| O  | -2.30646800 | 0.07891700  | -2.67857300 |
| H  | -2.02035600 | -0.11607300 | -1.75039100 |
| H  | -3.26403800 | -0.12344200 | -2.67254700 |
| C  | 3.66369100  | -2.53277300 | -1.47881500 |
| H  | 4.04491700  | -3.49138000 | -1.11660500 |
| C  | 4.53222000  | -1.47179900 | -1.72581300 |
| H  | 5.60355800  | -1.59679000 | -1.55112000 |
| C  | 4.05059500  | -0.22782800 | -2.19301600 |
| H  | 4.73994300  | 0.60082600  | -2.36152100 |
| C  | 2.69319500  | -0.02404200 | -2.43736100 |
| H  | 2.32967200  | 0.94553700  | -2.77976100 |

|   |             |             |             |
|---|-------------|-------------|-------------|
| C | 1.12587100  | -3.19994800 | -1.57908400 |
| H | 1.09957300  | -4.22679200 | -1.22231900 |
| C | 0.04337600  | -2.45845200 | -1.99329400 |
| H | -1.00813100 | -2.72532000 | -2.04488700 |
| N | 0.45698600  | -1.20026900 | -2.37180200 |
| H | -0.16770700 | -0.49933600 | -2.75771700 |
| N | 2.89748200  | 2.58675400  | 0.02525400  |
| H | 2.05331100  | 2.63645500  | -0.54217400 |
| H | 2.79837000  | 2.27198200  | 0.99464600  |
| C | 5.30137300  | 2.46024600  | 0.32985500  |
| H | 5.61562600  | 1.41518700  | 0.17094100  |
| H | 6.13583000  | 3.10950400  | 0.03411200  |
| H | 5.07733600  | 2.59168500  | 1.39801900  |
| N | 3.19961700  | -0.49786000 | 1.07728300  |
| H | 3.39236500  | -1.46782500 | 0.86515900  |
| H | 3.26074000  | 0.15118000  | 0.29745800  |
| C | 2.58315100  | -1.12296100 | 3.35773100  |
| H | 3.57955400  | -1.29359000 | 3.79835400  |
| H | 1.95351600  | -0.66995700 | 4.13290400  |
| C | 1.99710400  | -2.45865400 | 2.90336200  |
| H | 1.92856300  | -3.14333500 | 3.76485900  |
| H | 2.64880600  | -2.97320100 | 2.17695700  |
| N | 0.05116800  | -3.40664700 | 1.77359500  |
| H | 0.55636400  | -4.28310500 | 1.74395100  |
| H | -0.86782100 | -3.32787500 | 1.31460000  |
| O | -2.39134800 | -2.59009100 | 0.62606100  |
| H | -2.01937800 | -1.69259600 | 0.44894300  |
| C | -3.41454600 | -2.84406300 | -0.31084500 |
| H | -3.17079300 | -2.40578300 | -1.29518900 |
| H | -3.50251800 | -3.93463600 | -0.44875300 |

|   |             |             |             |
|---|-------------|-------------|-------------|
| C | -4.76894300 | -2.30111400 | 0.15188000  |
| H | -5.06379200 | -2.79216400 | 1.09069000  |
| H | -5.53091200 | -2.52328300 | -0.61032600 |
| N | -4.75001900 | -0.86583300 | 0.38927800  |
| H | -4.52013300 | -0.53062200 | 1.31859300  |
| C | -4.60263700 | 1.49158200  | -0.18894300 |
| H | -5.48371600 | 1.85342800  | 0.36603000  |
| H | -4.51106700 | 2.09429300  | -1.10532800 |
| N | -3.40995100 | 1.59300600  | 0.63102000  |
| H | -2.69394200 | 0.88756300  | 0.41381700  |
| C | -1.52813300 | 2.88044300  | 1.54823300  |
| H | -1.52533300 | 3.53588500  | 2.43289600  |
| H | -0.99028600 | 3.44474900  | 0.76831600  |
| C | -0.76889100 | 1.60607100  | 1.89488400  |
| H | -1.35220000 | 0.87105000  | 2.46372200  |
| H | 0.14735700  | 1.82437300  | 2.46102100  |
| O | 0.17584300  | 1.84723100  | -0.80316200 |
| H | -0.69045500 | 2.21466400  | -1.19326900 |

### Optimized coordinates of atoms of GPx-1 active center in –SeH form

C 2.72713700 -2.76604300 0.71216500  
O 2.66483900 -3.09408700 -0.46500600  
Se 0.17380500 -0.63993000 0.62009600  
O 2.06905400 -0.08307300 -2.07471400  
C 4.62834700 -0.18759500 -0.20221600  
O 5.08362700 0.13869800 -1.29480600  
C -4.28803800 -2.62641000 -1.01906100  
O -4.69594700 -2.46904600 -2.15726300  
C -1.70884200 3.03127600 -1.69982200  
C -0.89500900 1.93752200 -2.10753000  
C -1.22264000 2.18150500 2.56763800  
O -0.26149400 1.76657300 3.20891400  
C -2.80422500 -0.50145800 2.07038100  
O -2.43667000 -1.66835100 2.19578200  
O 1.08568900 -2.63189700 -2.59591300  
H 1.63154700 -3.09272900 -1.92301100  
H 1.88311000 -0.92411700 -2.54552700  
O 2.93543000 0.65454400 -2.96919500  
H 1.47831500 -0.32791200 0.01895600  
H 3.79987600 0.54625300 -2.51215800  
C -3.09556400 2.84116600 -1.59675400  
H -3.74286900 3.66156700 -1.30871000  
C -3.62882700 1.60427700 -1.92110700  
H -4.69979700 1.45138300 -1.87631300  
C -2.80782500 0.54221100 -2.34306000  
H -3.26419300 -0.40294000 -2.61030400  
C -1.43395300 0.69288900 -2.43265600  
H -0.80615900 -0.12266300 -2.76355500  
C -0.83016500 4.14583700 -1.49470400

H -1.10365700 5.14581900 -1.20072200  
C 0.43806200 3.70768700 -1.77322900  
H 1.37206000 4.24446300 -1.75542400  
N 0.40584400 2.38218300 -2.13071700  
H 1.21019800 1.83283100 -2.39733500  
N -2.96297900 -2.73410100 -0.72925600  
H -2.30659300 -2.83773100 -1.49027100  
H -2.64271900 -2.86556900 0.21844800  
C -5.22799500 -2.69303100 0.16777800  
H -5.89043700 -1.82805600 0.13638800  
H -5.84690100 -3.58500100 0.06190600  
H -4.70991500 -2.72336700 1.12523400  
N -3.18609500 0.00363700 0.88326600  
H -3.39040800 0.97492000 0.73354600  
H -3.05721000 -0.55939100 0.05424900  
C -2.87702200 0.41402000 3.28167400  
H -3.86193200 0.26889700 3.73353600  
H -2.14133800 0.04318100 3.99245100  
C -2.64240500 1.90560400 3.03295600  
H -2.76987000 2.43957900 3.97709500  
H -3.37535100 2.32468000 2.34043500  
N -1.10095600 2.91809900 1.44821700  
H -1.87991800 3.07840100 0.83271500  
H -0.19277300 3.05757700 1.03590500  
O 2.38549600 1.96321100 2.32761700  
H 1.45817600 1.89371500 2.63588100  
C 2.40326400 2.44091400 0.99313000  
H 1.59103400 1.99668200 0.41073000  
H 2.30011600 3.53249700 0.95675400  
C 3.73276300 2.05262300 0.36866600

H 4.54040900 2.64616700 0.80718500  
H 3.72494100 2.23256100 -0.70465900  
N 3.97255900 0.64267300 0.61636700  
H 3.61188400 0.31278000 1.49802100  
C 4.85063700 -1.61071900 0.32177800  
H 5.81019100 -1.63128200 0.84128200  
H 4.91782400 -2.26145200 -0.54537500  
N 3.81010600 -2.10698700 1.20064600  
H 3.86297300 -1.92952100 2.18960700  
C 1.59389400 -3.00722400 1.68779600  
H 1.97493900 -3.50982500 2.58354700  
H 0.89153800 -3.67831000 1.19823200  
C 0.89068400 -1.71540300 2.11086200  
H 1.53494300 -1.05846000 2.69237200  
H 0.00661900 -1.94076200 2.70311200  
O -0.21792700 -2.66055400 -1.97380200  
H -0.10781000 -2.05178400 -1.20817800

### Optimized coordinates of atoms of GPx-1 active center in –SeOH form

C 2.58302300 -2.67212000 0.92154400  
O 2.50803300 -3.37850000 -0.07930200  
Se 0.14492600 -0.28073900 0.72198100  
O 1.75578700 0.11752300 -0.03090700  
C 4.78353700 -0.63920800 -0.63325600  
O 4.41012800 -0.70518100 -1.79904600  
C -4.74191600 -2.37182100 -0.06014800  
O -5.29014700 -2.67874500 -1.10673300  
C -2.17311200 2.43310100 -1.97490800  
C -1.59484900 1.16926400 -2.27372000  
C -0.13125800 2.65940300 2.40487700  
O 0.52993400 2.09690300 3.26367300  
C -2.54754200 0.40288100 2.06589400  
O -2.21452200 -0.76403500 2.30730000  
O 0.49532800 -3.28776400 -1.86076700  
H 1.15184800 -3.58208700 -1.18666600  
H 1.31465300 -1.78880800 -2.43175900  
O 1.72800100 -0.89927300 -2.49081200  
H 1.76848100 -0.29333900 -0.93343000  
H 2.69334200 -1.02432100 -2.53938100  
C -3.56806000 2.52922500 -1.87345200  
H -4.03951300 3.48344400 -1.67054100  
C -4.33474600 1.39022500 -2.05623800  
H -5.41298300 1.45203700 -1.98626100  
C -3.74140500 0.14542700 -2.33463300  
H -4.36627800 -0.73022600 -2.45070700  
C -2.36579900 0.02089100 -2.44556900  
H -1.91032300 -0.93752700 -2.65813800  
C -1.08785800 3.36560900 -1.86449100



H -1.15770300 4.42555900 -1.68150600  
C 0.06604300 2.66358500 -2.09814700  
H 1.08812600 3.00178300 -2.10778300  
N -0.23198700 1.34555100 -2.33980800  
H 0.44425500 0.62744700 -2.57040600  
N -3.40360100 -2.47659400 0.12684100  
H -2.83881400 -2.87723600 -0.60756500  
H -2.95853000 -2.17611700 0.98411500  
C -5.52572100 -1.81805800 1.11424900  
H -5.99412700 -0.88188700 0.80852800  
H -6.32298200 -2.52012000 1.35689200  
H -4.91254600 -1.64217800 1.99678600  
N -3.15832700 0.73322300 0.91990800  
H -3.34699900 1.68427200 0.65819600  
H -3.26347300 0.04195200 0.19089000  
C -2.31788100 1.51555300 3.07097100  
H -3.29411200 1.77225700 3.49160100  
H -1.70664200 1.10763900 3.87251900  
C -1.65040900 2.78076200 2.52347000  
H -1.82365800 3.59781500 3.22855300  
H -2.08524700 3.09980800 1.57464300  
N 0.40908800 3.28999000 1.33785100  
H -0.16152700 3.49083000 0.53128400  
H 1.40335600 3.20223600 1.16675700  
O 3.09075300 2.44524300 0.20223900  
H 2.58410000 1.60784200 0.25269100  
C 3.84148600 2.37969800 -0.99423100  
H 3.31709100 1.78708300 -1.74812100  
H 3.96173300 3.39314000 -1.38534300  
C 5.23275400 1.78972500 -0.76600600

H 5.82241700 2.46957000 -0.15188200  
H 5.73596900 1.66699100 -1.72727400  
N 5.21553000 0.50670100 -0.07409700  
H 5.46098300 0.50298000 0.90056700  
C 4.81842100 -1.87097200 0.28190700  
H 5.74740300 -1.88234600 0.85594800  
H 4.78572500 -2.74847700 -0.35700500  
N 3.69640300 -1.95267200 1.19865100  
H 3.64935900 -1.29814200 1.96145700  
C 1.46677700 -2.60865600 1.94978000  
H 1.84806200 -3.04543500 2.87972200  
H 0.67449400 -3.25999600 1.58669700  
C 0.90685800 -1.22291800 2.25675000  
H 1.63227500 -0.53253000 2.68696700  
H 0.07019200 -1.29380700 2.94875500  
O -0.66789900 -3.01769600 -1.04757700  
H -0.44886800 -2.15576100 -0.62497500

### **Optimized coordinates of atoms of GPx-1 active center in –SeOOH form**

C -3.19433900 2.63985100 1.14482800  
O -3.98739800 3.55055600 1.35029700  
Se -0.15382300 0.55408800 0.18717900  
O -1.54299800 -0.15698400 -0.43800300  
C -5.02349900 -0.17872700 -0.43747500  
O -5.35701000 -0.43996500 -1.59460500  
C 4.16782700 2.83935900 -0.42127200  
O 4.39698800 3.16992700 -1.58154600  
C 2.56116700 -2.29425000 -1.69116000  
C 2.39271300 -0.95956800 -2.15309000  
C 0.52580300 -2.31214900 2.25494700  
O -0.10798300 -1.25443000 2.21136800  
C 2.62982200 -0.06052100 2.36788300  
O 2.38805100 1.14187700 2.50779700  
O -2.10408200 2.86760500 -1.93661700  
H -2.02817600 3.57157000 -2.58976100  
H -2.50441700 2.08631200 -2.39123300  
O -2.87063600 0.43299200 -2.80794700  
H -2.35245500 0.08633200 -2.05383500  
H -3.78876100 0.16182400 -2.63061500  
C 3.83438300 -2.70796400 -1.27527000  
H 3.99598800 -3.72149200 -0.92873700  
C 4.88513700 -1.80649100 -1.32585000  
H 5.87327700 -2.11663800 -1.01153300  
C 4.69212100 -0.49065800 -1.78290600  
H 5.52876400 0.19404600 -1.81467200  
C 3.44585100 -0.04918200 -2.20039200  
H 3.30857700 0.96764100 -2.54234500  
C 1.27805000 -2.92752600 -1.77890800

H 1.03346200 -3.94021400 -1.50712700  
C 0.40489800 -2.00025200 -2.27490500  
H -0.64848400 -2.07923100 -2.47607400  
N 1.06958000 -0.81509200 -2.49929700  
H 0.64833300 0.03146200 -2.84186600  
N 2.92262700 2.61821100 0.04371800  
H 2.13585200 2.68462500 -0.58604500  
H 2.75508800 2.28130800 0.98762300  
C 5.28607800 2.63140200 0.57783300  
H 5.88865200 1.78224000 0.25197500  
H 5.92888100 3.51098400 0.57734800  
H 4.92454800 2.44336600 1.58761300  
N 3.18451600 -0.54817700 1.24836900  
H 3.35559400 -1.52704300 1.10212000  
H 3.36509200 0.05778000 0.46245400  
C 2.34420300 -1.04858000 3.48212800  
H 3.27052800 -1.18173000 4.04726100  
H 1.62792300 -0.56564400 4.14185700  
C 1.82313200 -2.41372700 3.04323300  
H 1.62984400 -3.02338400 3.92959500  
H 2.56290000 -2.97083500 2.46262700  
N 0.11106900 -3.42258800 1.63638100  
H 0.65855100 -4.26507300 1.65764600  
H -0.75094300 -3.39544200 1.09405000  
O -2.27798200 -2.72030000 0.20296200  
H -1.97735400 -1.80080900 0.04098200  
C -3.44365700 -2.97353700 -0.56597100  
H -3.38355700 -2.46873200 -1.53354200  
H -3.49351900 -4.04816000 -0.75215100  
C -4.71712900 -2.54721300 0.15858100

H -4.80437900 -3.09047700 1.09891000  
H -5.58188300 -2.78607500 -0.46122900  
N -4.74310400 -1.12593400 0.47165000  
H -4.40224400 -0.82849500 1.37167500  
C -4.87528400 1.25969100 0.03973100  
H -5.65288300 1.49462000 0.76928500  
H -5.02146800 1.91136200 -0.82254700  
N -3.56431200 1.44570700 0.63323400  
H -2.83280200 0.82455700 0.28550500  
C -1.71335900 2.82115600 1.44979800  
H -1.66579700 3.46215400 2.33132400  
H -1.29663900 3.41488100 0.63310900  
C -0.86027000 1.59123800 1.72394600  
H -1.36121900 0.83321800 2.32108200  
H 0.06252700 1.86208100 2.23639200  
O 0.13932100 1.89179500 -0.94788700  
H -0.71208800 2.30453600 -1.29040700

**Figure S1.** Electron density (blue) and electrostatic potential (red) distribution along bond paths for non-covalent interactions in GPx-1 active center in –SeH form. Positions of minima are shown by dashed lines.

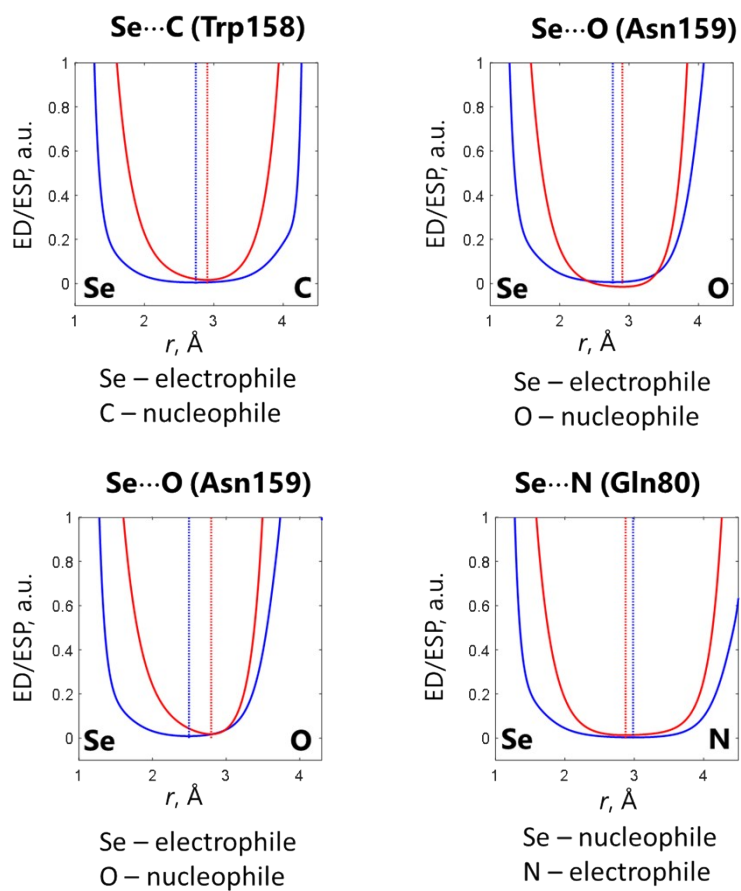

**Figure S2.** Electron density (blue) and electrostatic potential (red) distribution along bond paths for non-covalent interactions in GPx-1 active center in –SeOH form. Positions of minima are shown by dashed lines.

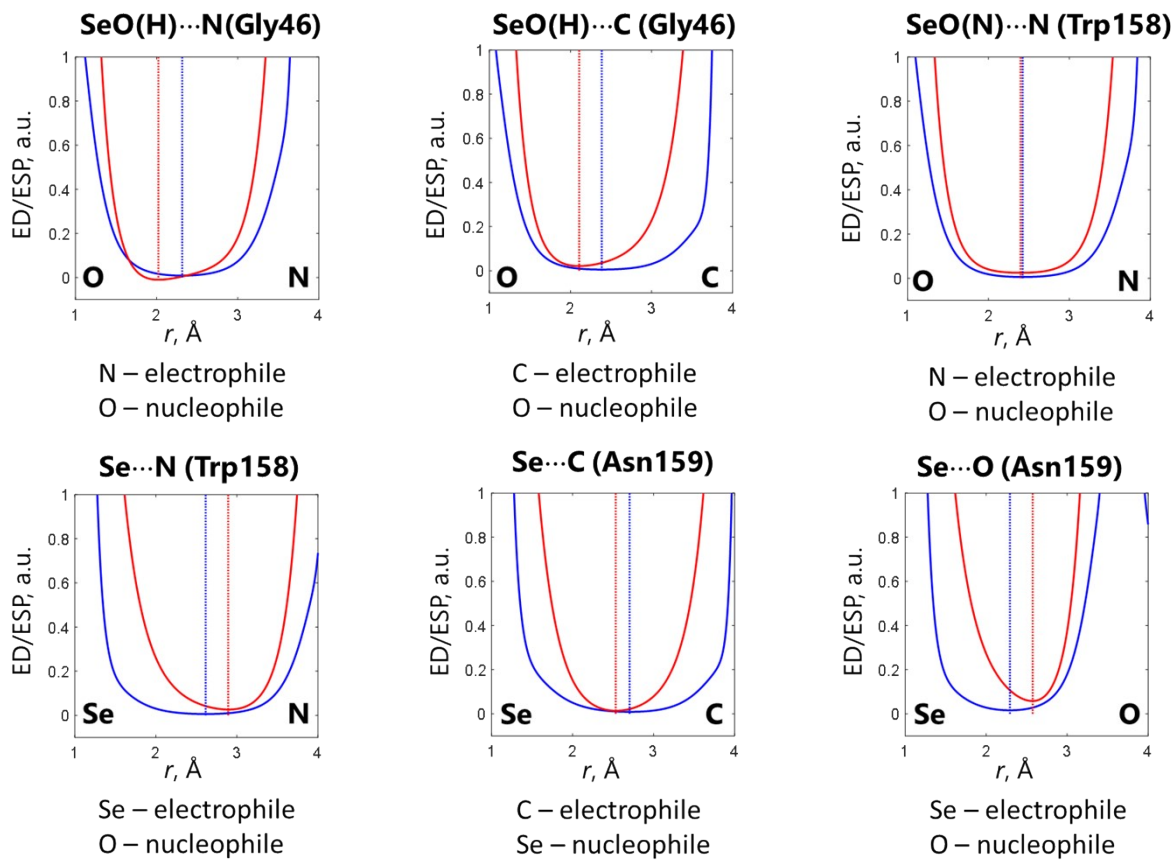

**Figure S3.** Electron density (blue) and electrostatic potential (red) distribution along bond paths for non-covalent interactions in GPx-1 active center in –SeOOH form. Positions of minima are shown by dashed lines.

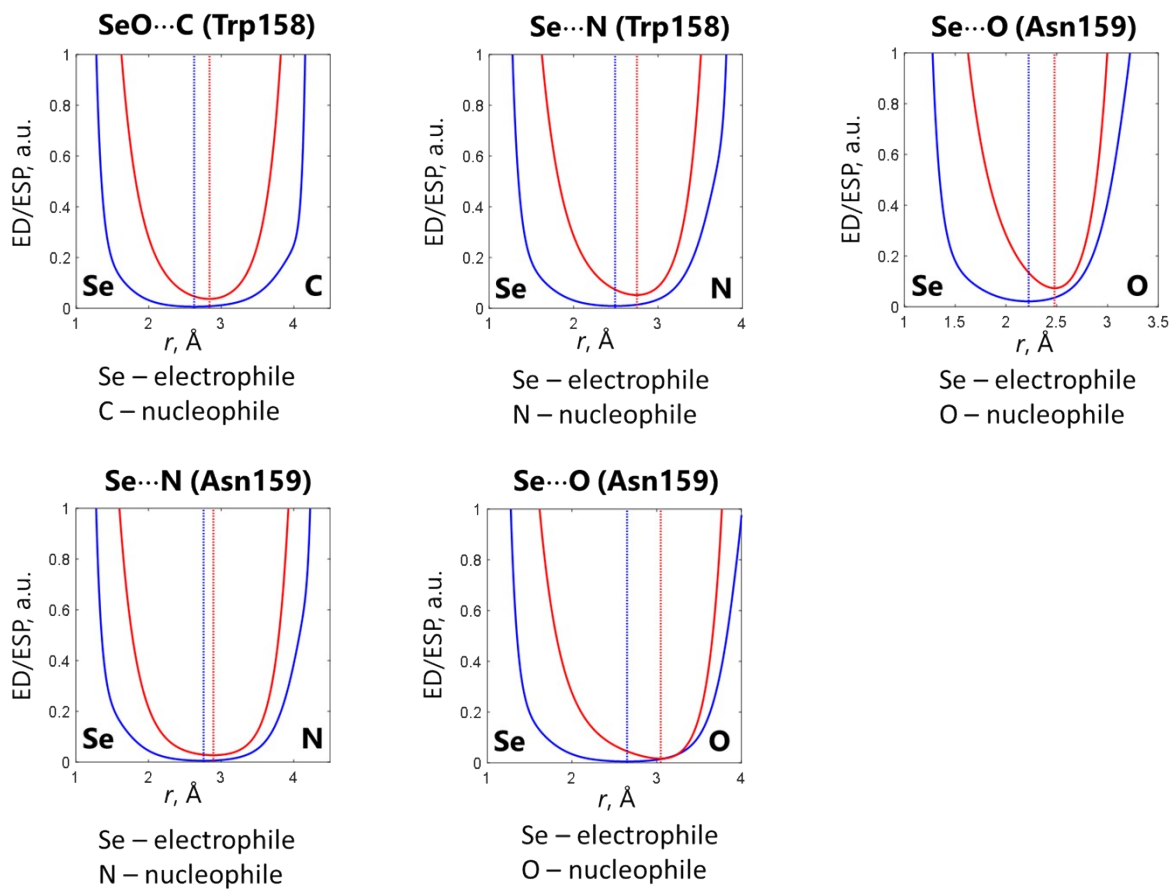

Supplement: d2ob00890d1.pdf [file d2ob00890d1.pdf]
